# Supplementary material for: The enol of propionic acid
Source: Royal Society of Chemistry journal article supplement (doi:10.1039/d3cc03711h), 2023-01-01
Supplement: d3cc03711h1.pdf [file d3cc03711h1.pdf]

## The Enol of Propionic acid

Akkad Danho, Artur Mardyukov, and Peter R. Schreiner\*

### Table of Contents

|                                                   |   |
|---------------------------------------------------|---|
| Experimental Procedures .....                     | 2 |
| <b>Figure S1:</b> .....                           | 3 |
| <b>Figure S2:</b> .....                           | 3 |
| <b>Figure S3:</b> .....                           | 4 |
| <b>Table S1:</b> .....                            | 5 |
| <b>Table S2:</b> .....                            | 6 |
| <b>Table S3:</b> .....                            | 7 |
| <b>References</b> .....                           | 8 |
| <b>B3LYP/def2-TZVP optimized structures</b> ..... | 9 |

## Experimental Procedures

**Matrix Apparatus Design.** A Sumitomo cryostat system consisting of an RDK 408D2 closed-cycle refrigerator cold head and an F-70 compressor unit was used for matrix isolation experiments. A polished CsI window was mounted in the cold head's sample holder. The sample holder, connected with silicon diodes for temperature measurements, was covered by a vacuum shroud, which was equipped with KBr windows to allow for IR measurements. In some experiments BaF<sub>2</sub> windows were used due to their higher transparency when measuring UV/vis spectra. The sample and the host gas (Ar, purity of 99.999%) were co-deposited at 3.5 K. All spectral data were collected at 3.5 K. The pyrolysis zone was equipped with a heatable 90 mm long quartz tube (inner diameter 7 mm), controlled by a Ni/CrNi thermocouple. The travel distance of the sample from the pyrolysis zone to the matrix was ~45 mm. Ar was stored in a 2 L gas balloon, which was evacuated and filled three times before every experiment. The sample was evaporated from a Schlenk tube at 70 °C (water) and reduced pressure ( $\sim 3 \times 10^{-6}$  mbar) and co-deposited with a high excess of argon on both sides of the matrix window in the dark (preventing unwanted photochemistry) at a rate of  $\sim 1$  mbar min<sup>-1</sup>, based on the pressure inside the Ar balloon. Pyrolyses were carried out at 500 °C. IR spectra were recorded between 7000 and 350 cm<sup>-1</sup> with a resolution of 0.7 cm<sup>-1</sup> with a Bruker Vertex 70 FTIR spectrometer. A spectrum of the cold matrix window before deposition was used as background spectrum for the subsequent IR measurements. UV/vis spectra were recorded between 190 and 800 nm with a resolution of 1 nm with a Jasco V-760 spectrophotometer. A high-pressure-mercury lamp equipped with a monochromator (LOT Quantum Design) or a low-pressure-mercury lamp (Grüntzel) fitted with a Vycor filter were used for irradiation of the matrix during photochemical experiments.

**Computations.** All DFT computations were performed with the Gaussian 16,<sup>1</sup> Revision C.01 program package (full citations for electronic structure codes are given at the end of this document) at the B3LYP/def2-TZVP<sup>2-4</sup> level of theory. The keywords Opt and Freq=NoRaman were used for the characterization of minima on the PES. For transition structures the keyword Opt=(ts,tight,calcfc,noeigen) was used. UV/Vis absorptions were computed by using the keyword td(50-50,nstates=10).

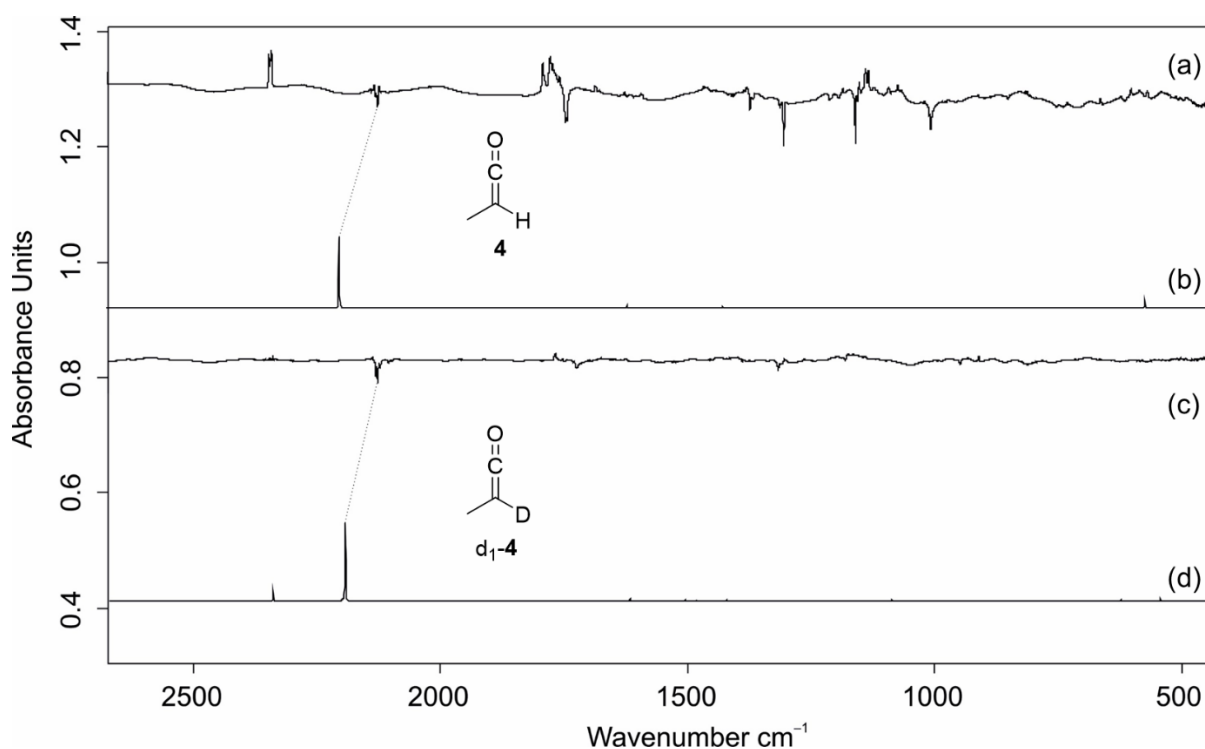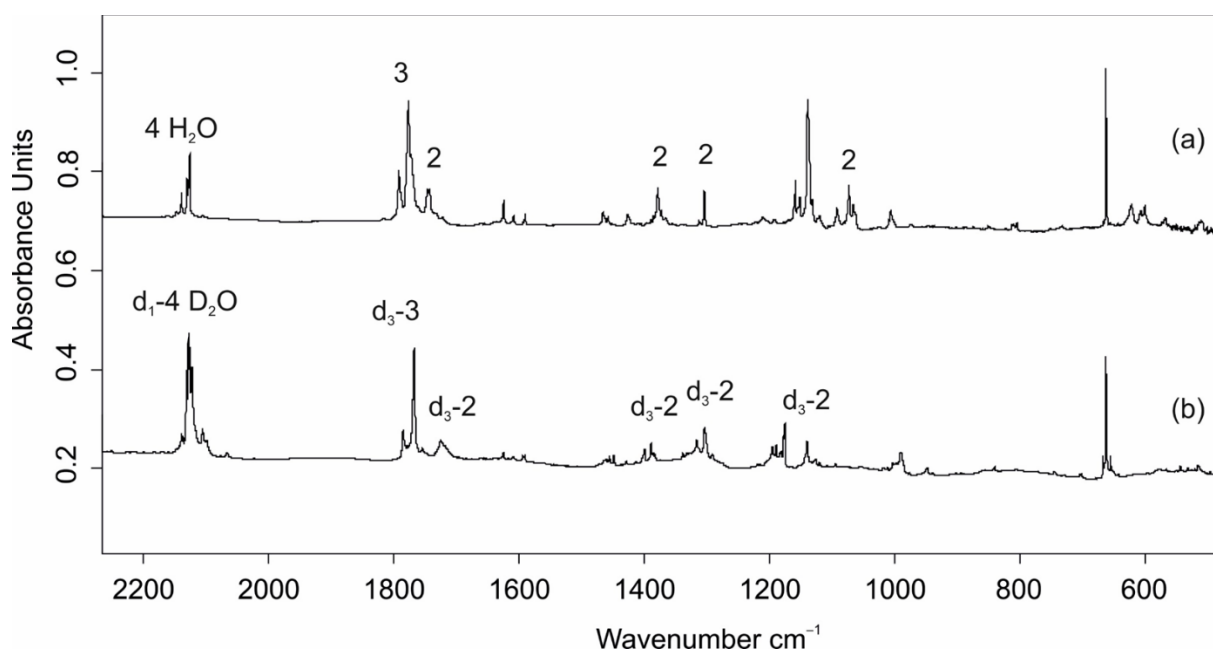

**Figure S2:** (a) IR spectra showing the product of pyrolysis of 1 in argon matrix with subsequent trapping in an argon matrix at 3.5 K (b) IR spectra showing the product of pyrolysis of d<sub>4</sub>-1 in argon matrix with subsequent trapping in an argon matrix at 10 K.

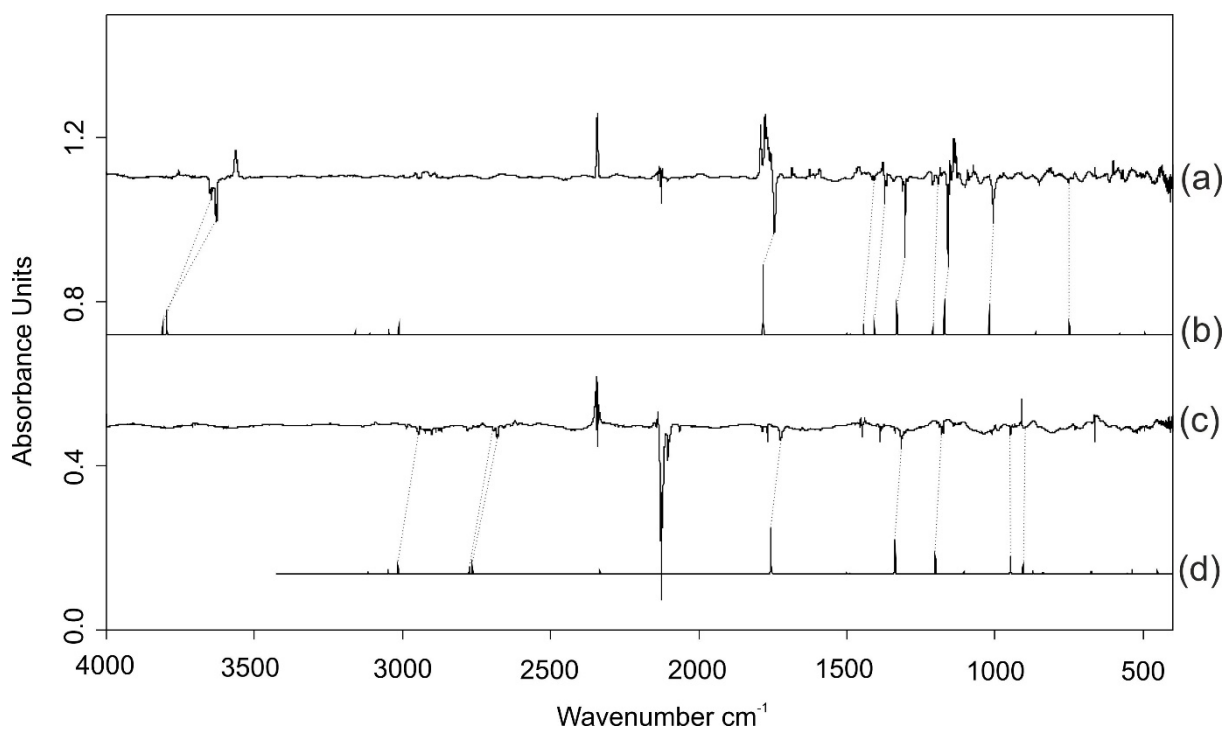

**Figure S3:** IR spectra showing the pyrolysis product of **1** with subsequent trapping in an argon matrix at 3.5 K. (a) IR difference spectra showing the photochemistry of **2** after irradiation with  $\lambda = 254$  nm in argon at 3.5 K. Downward bands assigned to **2** disappear while upward bands assigned **3** appear after 20 min irradiation time. (b) IR spectrum of **2** computed at B3LYP/def2TZVP. (c) IR difference spectra showing the photochemistry of  $d_4$ -**2** after irradiation with  $\lambda = 254$  nm in argon at 3.5 K. Downward bands assigned to  $d_3$ -**2** disappear while upward bands assigned to  $d_3$ -**3** appear after 20 min irradiation time. (d) IR spectrum of  $d_3$ -**2** computed at B3LYP/def2-TZVP.

**Table S1:** Illustration of charge density in comparison to C=C stretching bond in **2**, 1,2- ethenediol, and 1,1-ethenediol computed at the B3LYP/def2-TZVP level of theory.

| Illustration of Charge density                                                     | C=C stretching bond <sup>a</sup> cm <sup>-1</sup> | C=C stretching bond cm <sup>-1</sup> | Charge density in C=C-bond |
|------------------------------------------------------------------------------------|---------------------------------------------------|--------------------------------------|----------------------------|
| 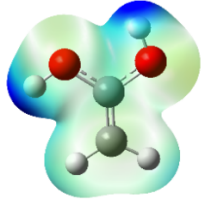  | 1753                                              | 1712 <sup>5,c</sup>                  | 0.183                      |
|   | 1756                                              | 1711 <sup>6,c</sup>                  | 0.172                      |
|  | 1784                                              | 1744 <sup>b</sup>                    | 0.378                      |

<sup>a</sup> B3LYP/def2-TZVP, harmonic approximation, unscaled frequencies. <sup>b</sup> Experiment: argon matrix, 3.5 K <sup>c</sup> Experiment: argon matrix, 10 K;

**Table S2:** Experimental (Ar matrix, 3.5 K) and computed IR frequencies of **2ct** and **d<sub>3</sub>-2ct** - band origins in cm<sup>-1</sup>, computed intensities (km mol<sup>-1</sup>) in parentheses.

| Mode | <b>2</b><br>Computed <sup>a</sup> | <b>2</b><br>Ar, 3.5 K <sup>b</sup> | <b>d<sub>3</sub>-2</b><br>Computed <sup>a</sup> | <b>d<sub>3</sub>-2</b><br>Ar, 3.5 K <sup>b</sup> | Assignment                            |
|------|-----------------------------------|------------------------------------|-------------------------------------------------|--------------------------------------------------|---------------------------------------|
| 1    | 3810 (57.0)                       | 3648 (m)                           | 3113 (10.9)                                     | 2986 (w)                                         | O–H stretching                        |
| 2    | 3795 (104.7)                      | 3630 (s)                           | 3045 (29.7)                                     | 2946 (m)                                         | O–H stretching                        |
| 3    | 3159 (21.1)                       | 2994 (w)                           | 3013 (51.9)                                     | 2901 (m)                                         | C–H stretching                        |
| 4    | 3112 (8.6)                        | 2946 (w)                           | 2772 (35.3)                                     | 2680 (m)                                         | C–H (CH <sub>3</sub> ), CH stretching |
| 5    | 3046 (29.7)                       | 2911 (w)                           | 2762.3 (66.7)                                   | 2675 (m)                                         | C–H (CH <sub>3</sub> ) stretching     |
| 6    | 3013 (53.2)                       | 2876 (w)                           | 2332 (16.0)                                     | 2277 (w)                                         | C–H (CH <sub>3</sub> ) stretching     |
| 7    | 1783 (271.5)                      | 1745 (s)                           | 1755 (272.5)                                    | 1722 (s)                                         | C=C stretching                        |
| 8    | 1502 (7.1)                        | 1473 (w)                           | 1499 (4.7)                                      | 1491 (w)                                         | C–H (CH <sub>3</sub> ) bending        |
| 9    | 1488 (6.3)                        | 1450 (w)                           | 1488 (6.0)                                      | 1473 (w)                                         | C–H (CH <sub>3</sub> ) twisting       |
| 10   | 1444 (41.9)                       | 1410 (m)                           | 1423 (1.5)                                      | 1415 (w)                                         | -                                     |
| 11   | 1407 (46.3)                       | 1370 (m)                           | 1336 (172.7)                                    | 1320 (s)                                         | C–C (CH <sub>3</sub> ) stretching     |
| 12   | 1331 (158.8)                      | 1305 (s)                           | 1200 (121.5)                                    | 1181 (s)                                         | O–H wagging                           |
| 13   | 1211 (38.0)                       | 1191 (m)                           | 1104 (9.2)                                      | 1093 (w)                                         | O–H and C–H in pl.                    |
| 14   | 1172 (171.9)                      | 1161 (s)                           | 1063 (0.2)                                      | -                                                | O–H wagging                           |
| 15   | 1112 (3.6)                        | 1106 (w)                           | 947 (85.1)                                      | 950 (m)                                          | C–CH <sub>3</sub> twisting            |
| 16   | 1065 (0.6)                        | 1048 (w)                           | 905 (55.3)                                      | -                                                | C–H (CH <sub>3</sub> ) twisting       |
| 17   | 1020 (121.0)                      | 1005 (s)                           | 870 (19.7)                                      | 857 (w)                                          | CCH in pl. def                        |
| 18   | 865 (14.5)                        | 850 (m)                            | 837 (6.8)                                       | 812 (w)                                          | C–CH <sub>3</sub> twisting            |
| 19   | 750 (68.8)                        | 709 (m)                            | 673 (17.8)                                      | 668 (m)                                          | CH wagging                            |
| 20   | 641 (4.3)                         | 616 (m)                            | 552 (7.4)                                       | 535 (w)                                          | OCO in pl. def.                       |
| 21   | 581 (10.7)                        | 565 (w)                            | 536 (26.4)                                      | 523 (w)                                          | -                                     |
| 22   | 495 (12.9)                        | -                                  | 452 (17.5)                                      | -                                                | C–O wagging                           |
| 23   | 345 (11.4)                        | -                                  | 269 (9.2)                                       | -                                                | O–H wagging                           |
| 24   | 272 (28.7)                        | -                                  | 243 (3.3)                                       | -                                                | CH <sub>3</sub> - def                 |
| 25   | 250 (3.5)                         | -                                  | 242 (0.6)                                       | -                                                | C–CH <sub>3</sub> wagging             |

|    |            |   |            |   |                            |
|----|------------|---|------------|---|----------------------------|
| 26 | 158 (86.2) | - | 139 (32.1) | - | CH <sub>3</sub> - twisting |
| 27 | 77 (68.3)  | - | 68 (61.4)  | - | CH <sub>3</sub> - twisting |

<sup>a</sup> B3LYP/def2-TZVP, harmonic approximation, unscaled frequencies, intensities (in parentheses) in km mol<sup>-1</sup>. <sup>b</sup> Experiment: argon matrix, 3.5 K; approximate relative intensities (w: weak, m: medium, s: strong).

**Table S3:** Experimental (Ar matrix, 3.5 K) and computed IR frequencies of **4 + H<sub>2</sub>O** and **d<sub>1</sub>-4 + D<sub>2</sub>O** - band origins in cm<sup>-1</sup>, computed intensities (km mol<sup>-1</sup>) in parentheses.

| Mode | <b>4 + H<sub>2</sub>O</b> |                        | <b>d<sub>1</sub>-4 + D<sub>2</sub>O</b> |                        | Assignment                               |
|------|---------------------------|------------------------|-----------------------------------------|------------------------|------------------------------------------|
|      | Computed <sup>a</sup>     | Ar, 3.5 K <sup>b</sup> | Computed <sup>a</sup>                   | Ar, 3.5 K <sup>b</sup> |                                          |
| 1    | 3860 (100.6)              | -                      | 2827 (42.8)                             | -                      | assym. O-H (H <sub>2</sub> O) stretching |
| 2    | 3717 (155.1)              | -                      | 2687(30.2)                              | -                      | sym. O-H (H <sub>2</sub> O) stretching   |
| 3    | 2201 (711.3)              | 2122 (m)               | 2195 (662.7)                            | 2128 (m)               | C=C stretching                           |
| 4    | 569 (61.2)                | -                      | 542 (14.3)                              | -                      | OCO in pl. def.                          |
| 5    | 352 (74.6)                | -                      | 262 (28.5)                              | -                      | O-H wagging                              |
| 6    | 240 (95.6)                | -                      | 175 (30.0)                              | -                      | -                                        |
| 7    | 43 (72.7)                 | -                      | 32 (25.0)                               | -                      | -                                        |

<sup>a</sup> B3LYP/def2-TZVP, harmonic approximation, unscaled frequencies, intensities (in parentheses) in km mol<sup>-1</sup>. <sup>b</sup> Experiment: argon matrix, 3.5 K; approximate relative intensities (w: weak, m: medium, s: strong).

## References

- 1 M. J. Frisch, G. W. Trucks, H. B. Schlegel, G. E. Scuseria, M. A. Robb, J. R. Cheeseman, G. Scalmani, V. Barone, G. A. Petersson, H. Nakatsuji, X. Li, M. Caricato, A. V. Marenich, J. Bloino, B. G. Janesko, R. Gomperts, B. Mennucci, H. P. Hratchian, J. V. Ortiz, A. F. Izmaylov, J. L. Sonnenberg, Williams, F. Ding, F. Lipparini, F. Egidi, J. Goings, B. Peng, A. Petrone, T. Henderson, D. Ranasinghe, V. G. Zakrzewski, J. Gao, N. Rega, G. Zheng, W. Liang, M. Hada, M. Ehara, K. Toyota, R. Fukuda, J. Hasegawa, M. Ishida, T. Nakajima, Y. Honda, O. Kitao, H. Nakai, T. Vreven, K. Throssell, J. A. Montgomery Jr., J. E. Peralta, F. Ogliaro, M. J. Bearpark, J. J. Heyd, E. N. Brothers, K. N. Kudin, V. N. Staroverov, T. A. Keith, R. Kobayashi, J. Normand, K. Raghavachari, A. P. Rendell, J. C. Burant, S. S. Iyengar, J. Tomasi, M. Cossi, J. M. Millam, M. Klene, C. Adamo, R. Cammi, J. W. Ochterski, R. L. Martin, K. Morokuma, O. Farkas, J. B. Foresman and D. J. Fox, *Gaussian 16 Rev. C.01*, Wallingford, CT, 2016.
- 2 A. D. Becke, Density-functional exchange-energy approximation with correct asymptotic behavior, *Phys. Rev. A*, 1988, **38**, 3098–3100.
- 3 A. D. Becke, Density-functional thermochemistry. III. The role of exact exchange, *J. Chem. Phys.*, 1993, **98**, 5648–5652.
- 4 C. Lee, W. Yang and R. G. Parr, Development of the Colle-Salvetti correlation-energy formula into a functional of the electron density, *Phys. Rev., B*, 1988, **37**, 785–789.
- 5 A. Mardyukov, F. Keul and P. R. Schreiner, 1,1,2-Ethenetriol: The Enol of Glycolic Acid, a High-Energy Prebiotic Molecule, *Angew. Chem. Int. Ed.*, 2021, **60**, 15313–15316.
- 6 A. Mardyukov, R. C. Wende and P. R. Schreiner, Matrix isolation and photorearrangement of cis- and trans-1,2-ethenediol to glycolaldehyde, *Chem. Commun.*, 2023, **59**, 2596–2599.



**B3LYP/def2-TZVP** optimized structures (distances in bohr), electronic energies (in hartree) and zero-point vibrational energies (ZPVE)

**3T<sub>g</sub>**: Propionic acid *trans, gauche* (C<sub>s</sub>)

|   |              |              |              |
|---|--------------|--------------|--------------|
| C | -0.590199000 | -0.815614000 | 0.000000000  |
| C | 0.000000000  | 0.572668000  | 0.000000000  |
| O | -0.967528000 | 1.523068000  | 0.000000000  |
| O | 1.171190000  | 0.847672000  | 0.000000000  |
| H | -1.249341000 | -0.888781000 | 0.869832000  |
| H | -0.518598000 | 2.383032000  | 0.000000000  |
| C | 0.458718000  | -1.918842000 | 0.000000000  |
| H | -0.022858000 | -2.897490000 | 0.000000000  |
| H | 1.099864000  | -1.851585000 | -0.878863000 |
| H | 1.099864000  | -1.851585000 | 0.878863000  |
| H | -1.249341000 | -0.888781000 | -0.869832000 |

E = -268.421915

ZPVE = 16.8437 kcal mol<sup>-1</sup>

**3T<sub>t</sub>**: Propionic acid *trans, trans* (C<sub>1</sub>)

|   |              |              |              |
|---|--------------|--------------|--------------|
| C | 0.691794000  | -0.731425000 | 0.000006000  |
| C | -0.562702000 | 0.106370000  | 0.000005000  |
| O | -1.676277000 | -0.667789000 | -0.000005000 |
| O | -0.615378000 | 1.308260000  | 0.000002000  |
| H | 0.641255000  | -1.392684000 | 0.869840000  |
| H | -2.437889000 | -0.066937000 | -0.000010000 |
| C | 1.970655000  | 0.094320000  | -0.000004000 |
| H | 2.842822000  | -0.560655000 | -0.000006000 |
| H | 2.023655000  | 0.736795000  | -0.878873000 |
| H | 2.023661000  | 0.736807000  | 0.878853000  |
| H | 0.641256000  | -1.392689000 | -0.869823000 |

E = -268.427817

ZPVE = 16.8441 kcal mol<sup>-1</sup>

**3C<sub>t</sub>**: Propionic acid *cis, trans* (C<sub>s</sub>)

|   |              |              |              |
|---|--------------|--------------|--------------|
| C | -0.543447000 | -0.820609000 | 0.000000000  |
| C | 0.000000000  | 0.597980000  | 0.000000000  |
| O | -0.944578000 | 1.578756000  | 0.000000000  |
| O | 1.159881000  | 0.890383000  | 0.000000000  |
| H | -1.193349000 | -0.931388000 | 0.875133000  |
| H | -1.831910000 | 1.197439000  | 0.000000000  |
| C | 0.547136000  | -1.883103000 | 0.000000000  |
| H | 1.184029000  | -1.786348000 | 0.878719000  |
| H | 0.105993000  | -2.880684000 | 0.000000000  |
| H | 1.184029000  | -1.786348000 | -0.878719000 |

H -1.193349000 -0.931388000 -0.875133000

E = -268.419824

ZPVE = 16.8436 kcal mol<sup>-1</sup>

**3C<sub>g</sub>**: Propionic acid *cis, gauche* (C<sub>1</sub>)

C -1.880934000 0.074665000 -0.273415000

C -0.696804000 -0.640215000 0.383619000

C 0.677605000 -0.095711000 0.031225000

O 0.816432000 1.257156000 0.069841000

O 1.619862000 -0.780085000 -0.245281000

H -2.811106000 -0.437715000 -0.025874000

H -1.784729000 0.089263000 -1.359995000

H -1.994264000 1.107620000 0.068115000

H -0.684113000 -1.694351000 0.111895000

H -0.791859000 -0.595087000 1.473973000

H -0.023488000 1.681265000 0.286830000

E = -268.417695

ZPVE = 16.8434 kcal mol<sup>-1</sup>

**2ct**: Enol *cis, anti* (C<sub>s</sub>)

O 0.484943000 1.747677000 0.000000000

C 0.000000000 0.469226000 0.000000000

O -1.352502000 0.485390000 0.000000000

C 0.727765000 -0.646519000 0.000000000

C 0.156695000 -2.031989000 0.000000000

H 1.448583000 1.725370000 0.000000000

H -1.642187000 1.405966000 0.000000000

H 1.805957000 -0.534433000 0.000000000

H -0.932419000 -2.007130000 0.000000000

H 0.476887000 -2.599307000 0.879344000

H 0.476887000 -2.599307000 -0.879344000

E = -268.385474

ZPVE = 16.8414 kcal mol<sup>-1</sup>

**2cc**: Enol *cis, cis* (C<sub>1</sub>)

O 1.639201000 -0.766582000 -0.093169000

C 0.463858000 -0.068535000 0.008326000

O 0.624479000 1.289656000 0.078456000

C -0.720546000 -0.667065000 0.028801000

C -2.040058000 0.036441000 -0.019368000

H 2.254766000 -0.442876000 0.578833000

H 1.302932000 1.554187000 -0.557479000

|   |              |              |              |
|---|--------------|--------------|--------------|
| H | -0.706918000 | -1.747980000 | 0.081513000  |
| H | -1.912984000 | 1.111141000  | -0.142112000 |
| H | -2.613991000 | -0.130585000 | 0.897215000  |
| H | -2.652766000 | -0.333534000 | -0.846817000 |

E = -268.381738

ZPVE = 16.8412 kcal mol<sup>-1</sup>

**2tc:** Enol *anti*, *syn* (C<sub>1</sub>)

|   |              |              |              |
|---|--------------|--------------|--------------|
| O | 1.726225000  | -0.618777000 | 0.001764000  |
| C | 0.494251000  | -0.035096000 | -0.001152000 |
| O | 0.628291000  | 1.318297000  | -0.101561000 |
| C | -0.672158000 | -0.680021000 | 0.034426000  |
| C | -2.017218000 | -0.023127000 | -0.017692000 |
| H | 1.621891000  | -1.576563000 | -0.048514000 |
| H | 0.490686000  | 1.732229000  | 0.757738000  |
| H | -0.645281000 | -1.762902000 | 0.101016000  |
| H | -1.926159000 | 1.047099000  | -0.201439000 |
| H | -2.575301000 | -0.160883000 | 0.914215000  |
| H | -2.631212000 | -0.445686000 | -0.818130000 |

E = -268.378994

ZPVE = 16.8410 kcal mol<sup>-1</sup>

**2tt:** Enol *anti*, *anti* (C<sub>1</sub>)

|   |              |              |              |
|---|--------------|--------------|--------------|
| O | -1.735635000 | -0.596030000 | 0.000258000  |
| C | -0.507716000 | -0.026427000 | 0.002626000  |
| O | -0.683108000 | 1.313252000  | -0.004498000 |
| C | 0.658425000  | -0.682775000 | 0.007339000  |
| C | 2.017274000  | -0.046606000 | -0.004071000 |
| H | -1.633277000 | -1.553412000 | -0.036431000 |
| H | 0.178218000  | 1.742137000  | 0.047633000  |
| H | 0.616976000  | -1.765270000 | 0.034401000  |
| H | 2.523429000  | -0.118590000 | 0.964346000  |
| H | 1.987774000  | 1.014695000  | -0.270040000 |
| H | 2.668924000  | -0.522487000 | -0.741353000 |

E = -268.382319

ZPVE = 16.8412 kcal mol<sup>-1</sup>

**4:** Keten (C<sub>1</sub>)

|   |              |              |              |
|---|--------------|--------------|--------------|
| O | 1.944225000  | -1.189009000 | -0.248953000 |
| C | 1.222140000  | -0.362573000 | 0.133609000  |
| C | 0.391536000  | 0.560678000  | 0.554895000  |
| C | -0.067965000 | 1.726361000  | -0.294011000 |

|   |              |             |              |
|---|--------------|-------------|--------------|
| H | 0.109405000  | 0.499383000 | 1.599392000  |
| H | 0.299813000  | 1.640095000 | -1.315977000 |
| H | 0.295398000  | 2.671341000 | 0.115342000  |
| H | -1.157603000 | 1.767276000 | -0.333003000 |

E = -268.380126

ZPVE = 16.8411 kcal mol<sup>-1</sup>

**TS1: Enol rotation 2ct – 2tt (C<sub>1</sub>)**

|   |              |              |              |
|---|--------------|--------------|--------------|
| O | 1.726224000  | -0.618778000 | 0.001764000  |
| C | 0.494250000  | -0.035096000 | -0.001152000 |
| O | 0.628296000  | 1.318296000  | -0.101561000 |
| C | -0.672160000 | -0.680020000 | 0.034427000  |
| C | -2.017219000 | -0.023125000 | -0.017693000 |
| H | 1.621889000  | -1.576565000 | -0.048516000 |
| H | 0.490682000  | 1.732228000  | 0.757737000  |
| H | -0.645284000 | -1.762901000 | 0.101018000  |
| H | -1.926160000 | 1.047103000  | -0.201429000 |
| H | -2.575307000 | -0.160891000 | 0.914210000  |
| H | -2.631209000 | -0.445675000 | -0.818139000 |

E = -268.378994

ZPVE = 16.8410 kcal mol<sup>-1</sup>

**TS2: Enol rotation 2ct – 2cc (C<sub>1</sub>)**

|   |              |              |              |
|---|--------------|--------------|--------------|
| O | 1.672160000  | -0.707542000 | -0.097082000 |
| C | 0.462857000  | -0.050422000 | -0.010000000 |
| O | 0.597790000  | 1.306203000  | 0.040661000  |
| C | -0.712924000 | -0.667587000 | -0.014503000 |
| C | -2.041286000 | 0.022190000  | 0.006811000  |
| H | 1.962992000  | -0.976726000 | 0.782466000  |
| H | 1.501945000  | 1.516367000  | -0.223386000 |
| H | -0.686602000 | -1.749139000 | -0.037500000 |
| H | -1.927685000 | 1.104056000  | -0.046028000 |
| H | -2.600202000 | -0.213047000 | 0.917885000  |
| H | -2.661933000 | -0.295888000 | -0.835912000 |

E = -268.381272

ZPVE = 16.8411 kcal mol<sup>-1</sup>

**TS3: Enol rotation 2ct – 2tc (C<sub>1</sub>)**

|   |              |              |              |
|---|--------------|--------------|--------------|
| O | -1.647916000 | -0.775027000 | 0.041859000  |
| C | -0.475054000 | -0.079363000 | -0.005159000 |
| O | -0.664272000 | 1.282813000  | -0.100129000 |
| C | 0.709450000  | -0.679991000 | 0.003148000  |

|   |              |              |              |
|---|--------------|--------------|--------------|
| C | 2.030252000  | 0.022999000  | -0.006337000 |
| H | -2.350607000 | -0.179216000 | -0.245715000 |
| H | -0.597366000 | 1.688389000  | 0.772839000  |
| H | 0.699231000  | -1.762599000 | 0.025794000  |
| H | 1.909820000  | 1.100084000  | -0.120368000 |
| H | 2.655700000  | -0.330116000 | -0.831178000 |
| H | 2.592840000  | -0.160701000 | 0.914873000  |

E = -268.380695

ZPVE = 16.8411 kcal mol<sup>-1</sup>

**TS4:** Enol **2tt** – propionic acid **3C<sub>t</sub>** (C<sub>1</sub>)

|   |              |              |              |
|---|--------------|--------------|--------------|
| O | 1.531416000  | -0.839845000 | 0.141325000  |
| C | 0.594783000  | 0.005200000  | -0.061371000 |
| O | 0.887352000  | 1.294645000  | -0.015945000 |
| C | -0.671238000 | -0.635238000 | -0.188222000 |
| C | -1.969033000 | 0.063637000  | 0.143753000  |
| H | 0.473329000  | -1.515155000 | 0.314000000  |
| H | 0.120262000  | 1.810434000  | -0.301129000 |
| H | -0.691383000 | -1.249889000 | -1.087941000 |
| H | -1.942866000 | 0.517798000  | 1.137196000  |
| H | -2.791877000 | -0.652009000 | 0.145456000  |
| H | -2.244695000 | 0.848834000  | -0.575574000 |

E = -268.313397

ZPVE = 16.8369 kcal mol<sup>-1</sup>

**TS5:** Enol **2tt** – propionic acid **3C<sub>g</sub>** (C<sub>1</sub>)

|   |              |              |              |
|---|--------------|--------------|--------------|
| O | 1.622288000  | -0.738064000 | 0.210771000  |
| C | 0.576958000  | 0.028739000  | -0.056685000 |
| O | 0.728890000  | 1.297209000  | 0.035863000  |
| C | -0.704729000 | -0.315896000 | -0.581770000 |
| C | -1.931527000 | -0.131793000 | 0.314480000  |
| H | 1.345498000  | -1.663286000 | 0.226766000  |
| H | -0.280792000 | 1.162279000  | -0.684720000 |
| H | -0.744297000 | -1.218754000 | -1.190398000 |
| H | -2.824862000 | -0.004769000 | -0.298662000 |
| H | -1.841689000 | 0.754945000  | 0.944089000  |
| H | -2.107493000 | -0.989872000 | 0.973699000  |

E = -268.306292

ZPVE = 16.8364 kcal mol<sup>-1</sup>

**TS6:** Enol **2ct** – propionic acid **3T<sub>t</sub>** (C<sub>1</sub>)

|   |             |              |             |
|---|-------------|--------------|-------------|
| O | 1.568027000 | -0.821793000 | 0.210759000 |
|---|-------------|--------------|-------------|

|   |              |              |              |
|---|--------------|--------------|--------------|
| C | 0.554043000  | -0.016638000 | -0.049788000 |
| O | 0.716680000  | 1.265595000  | -0.004762000 |
| C | -0.720071000 | -0.385104000 | -0.539609000 |
| C | -1.958535000 | -0.091513000 | 0.307361000  |
| H | 2.377983000  | -0.293154000 | 0.289816000  |
| H | -0.285367000 | 1.083153000  | -0.738190000 |
| H | -0.765403000 | -1.333061000 | -1.068910000 |
| H | -2.834885000 | 0.018101000  | -0.333074000 |
| H | -1.853504000 | 0.832906000  | 0.877347000  |
| H | -2.169091000 | -0.898825000 | 1.017252000  |

E = -268.309356

ZPVE = 16.8366 kcal mol<sup>-1</sup>

**TS7:** Enol **2ct** – propionic acid **3T<sub>g</sub>** (C<sub>1</sub>)

|   |              |              |              |
|---|--------------|--------------|--------------|
| O | 1.481120000  | -0.888282000 | 0.135655000  |
| C | 0.559755000  | -0.010897000 | -0.078221000 |
| O | 0.846845000  | 1.278832000  | -0.080029000 |
| C | -0.722474000 | -0.594859000 | -0.163913000 |
| C | -2.000901000 | 0.149621000  | 0.130116000  |
| H | 0.390277000  | -1.499736000 | 0.374638000  |
| H | 1.766393000  | 1.395281000  | 0.205575000  |
| H | -0.765550000 | -1.298141000 | -0.995084000 |
| H | -2.313038000 | 0.804580000  | -0.690976000 |
| H | -1.906441000 | 0.766832000  | 1.025264000  |
| H | -2.813642000 | -0.556408000 | 0.307680000  |

E = -268.316276

ZPVE = 16.8371 kcal mol<sup>-1</sup>

**TS8:** Enol **2ct** – ketene (**4**) – H<sub>2</sub>O elimination (C<sub>1</sub>)

|   |              |              |              |
|---|--------------|--------------|--------------|
| O | -1.719768000 | -0.687179000 | -0.081255000 |
| C | -0.322677000 | 0.084728000  | -0.024175000 |
| O | -0.809816000 | 1.258709000  | 0.010515000  |
| C | 0.803069000  | -0.614957000 | -0.033278000 |
| C | 2.147444000  | 0.053352000  | 0.025145000  |
| H | -1.874654000 | -1.166025000 | 0.748072000  |
| H | -1.904262000 | 0.461034000  | 0.008900000  |
| H | 0.741834000  | -1.690074000 | -0.116656000 |
| H | 2.041830000  | 1.135165000  | 0.106667000  |
| H | 2.736493000  | -0.158184000 | -0.871863000 |
| H | 2.728417000  | -0.292896000 | 0.884648000  |

E = -268.318666

ZPVE = 16.8372 kcal mol<sup>-1</sup>
